# Supplementary material
Source: publisher figshare collection journal article supplement (https://acs.figshare.com/ndownloader/files/4166557)
Supplement: Supplementary file 1 [file 4166557]

Supplementary information

Adsorption-desorption of Cd(II) and Pb(II) on

Ca-montmorillonite

*Yan Li,<sup>†,‡</sup> Ji-de Wang,\*<sup>§</sup> Xiao-jun Wang,\*<sup>†</sup> Juan-fang Wang<sup>†</sup>*

<sup>†</sup> Xinjiang Technical Institute of Physics and Chemistry, Chinese Academy of Sciences, Urumqi 830011, P.R. China

<sup>‡</sup> Graduate School of the Chinese Academy of Sciences, Beijing 100049, P.R. China

<sup>§</sup> Xijiang University, Urumqi 830046, P.R. China

Values obtained by calculation from the pseudo-second order kinetic equation and their fitting to the experimental results were showed in Figure1 and Table 1.

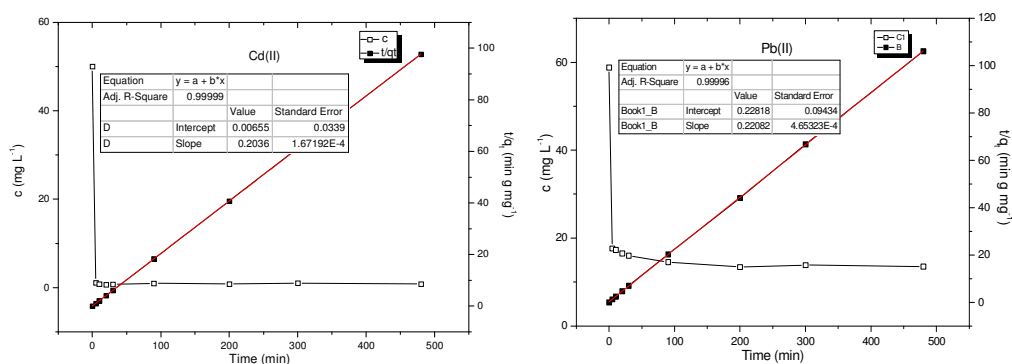

Figure 1. The effect of contact time on adsorption of Cd(II) and Pb(II), and the second-order kinetics study for adsorption of Cd(II) and Pb(II) (temperature: 303 K; working concentration: Cd(II), 50 mg L<sup>-1</sup>; Pb(II), 58.79 mg L<sup>-1</sup>)

Table 1. Kinetics parameters for adsorption of Cd(II) and Pb(II) at 303 K (working concentration: Cd(II), 50 mg L<sup>-1</sup>; Pb(II), 58.79 mg L<sup>-1</sup>).

| Heavy metal | Amount of adsorption (mg g <sup>-1</sup> ) |            | Deviation (%) | $k$<br>(g mg <sup>-1</sup> min <sup>-1</sup> ) | $R^2$ |
|-------------|--------------------------------------------|------------|---------------|------------------------------------------------|-------|
|             | Experimental                               | Calculated |               |                                                |       |
| Cd          | 4.9150                                     | 4.9116     | -0.0692       | 6.3287                                         | 0.999 |
| Pb          | 4.4940                                     | 4.5286     | 0.7640        | 0.2137                                         | 0.999 |
